# Supplementary material
Source: PubMed Central journal article supplement (PMC4191017)

**Supplemental Table 1:**Flow cytometric verification of immunomagnetic sorting for WES

| <b>Cohort ID</b> | <b>PNH Fraction (%CD59-)</b> | <b>Normal Fraction (%CD59+)</b> |
|------------------|------------------------------|---------------------------------|
| PNH1             | 99.1%                        | 98.4%                           |
| PNH2             | 96.8%                        | 95.6%                           |
| PNH3             | 69.9%                        | 99.8%                           |
| PNH4             | 94.3%                        | 97.7%                           |
| PNH5             | 85.8%                        | 92.1%                           |
| PNH6             | 82.6%                        | 96.6%                           |
| PNH7             | 51.6%                        | 91.9%                           |
| PNH8             | 87.2%                        | 80.9%                           |
| PNH9             | 34.4%                        | 96.8%                           |
| PNH10            | 84.9%                        | 94.3%                           |
| PNH11            | 76.8%                        | 95.7%                           |
| PNH12            | 97.1%                        | 95.3%                           |

**Supplemental table 2.** Panel of 61 genes for targeted deep NGS sequencing

| <b>Gene Name</b> |               |               |
|------------------|---------------|---------------|
| <i>BCOR</i>      | <i>CSF3R</i>  | <i>IRF4</i>   |
| <i>BCORL1</i>    | <i>FLT3</i>   | <i>JAK2</i>   |
| <i>RAD21</i>     | <i>KIT</i>    | <i>KDM6A</i>  |
| <i>SMC3</i>      | <i>U2AF1</i>  | <i>MECOM</i>  |
| <i>STAG2</i>     | <i>U2AF2</i>  | <i>MED12</i>  |
| <i>DDX41</i>     | <i>APC</i>    | <i>MLL</i>    |
| <i>DDX54</i>     | <i>ASXL1</i>  | <i>NPM1</i>   |
| <i>DHX29</i>     | <i>BTRC</i>   | <i>PHF6</i>   |
| <i>GLI1</i>      | <i>LUC7L2</i> | <i>PRPF8</i>  |
| <i>GLI2</i>      | <i>CALR</i>   | <i>RNF25</i>  |
| <i>PTCH1</i>     | <i>CBL</i>    | <i>RUNX1</i>  |
| <i>IDH1</i>      | <i>CDH23</i>  | <i>SETBP1</i> |
| <i>IDH2</i>      | <i>CEBPA</i>  | <i>SF3B1</i>  |
| <i>EED</i>       | <i>CFTR</i>   | <i>SIMC1</i>  |
| <i>EZH2</i>      | <i>CUX1</i>   | <i>SRSF2</i>  |
| <i>SUZ12</i>     | <i>DNMT3A</i> | <i>STAT3</i>  |
| <i>KRAS</i>      | <i>ERBB4</i>  | <i>TET2</i>   |
| <i>NF1</i>       | <i>ETV6</i>   | <i>TP53</i>   |
| <i>NRAS</i>      | <i>GATA2</i>  | <i>WT1</i>    |
| <i>PTPN11</i>    | <i>GNB1</i>   | <i>ZRSR2</i>  |
| <i>CSF1R</i>     |               |               |

**Supplemental Figure 1:** PNH patients may contain two independent PIGA mutations. **A)** Sanger sequencing of bacterial subcloning experiments demonstrates the presence of two separate PIGA mutations in PNH2. **B)** Variant allele frequencies from whole exome sequencing suggests that the MAGEC1 mutation (31%, clone size 32%) preceded the PIGA-1 (L83fs) mutation (29%, clone size 58%).

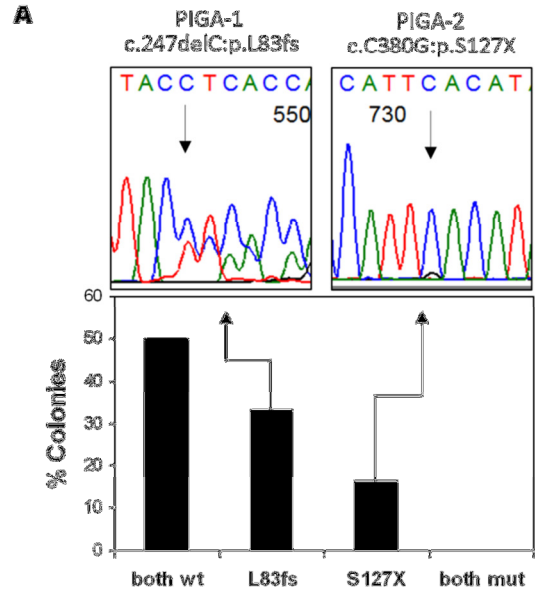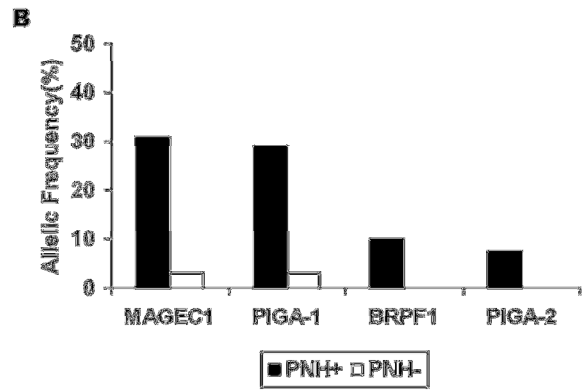

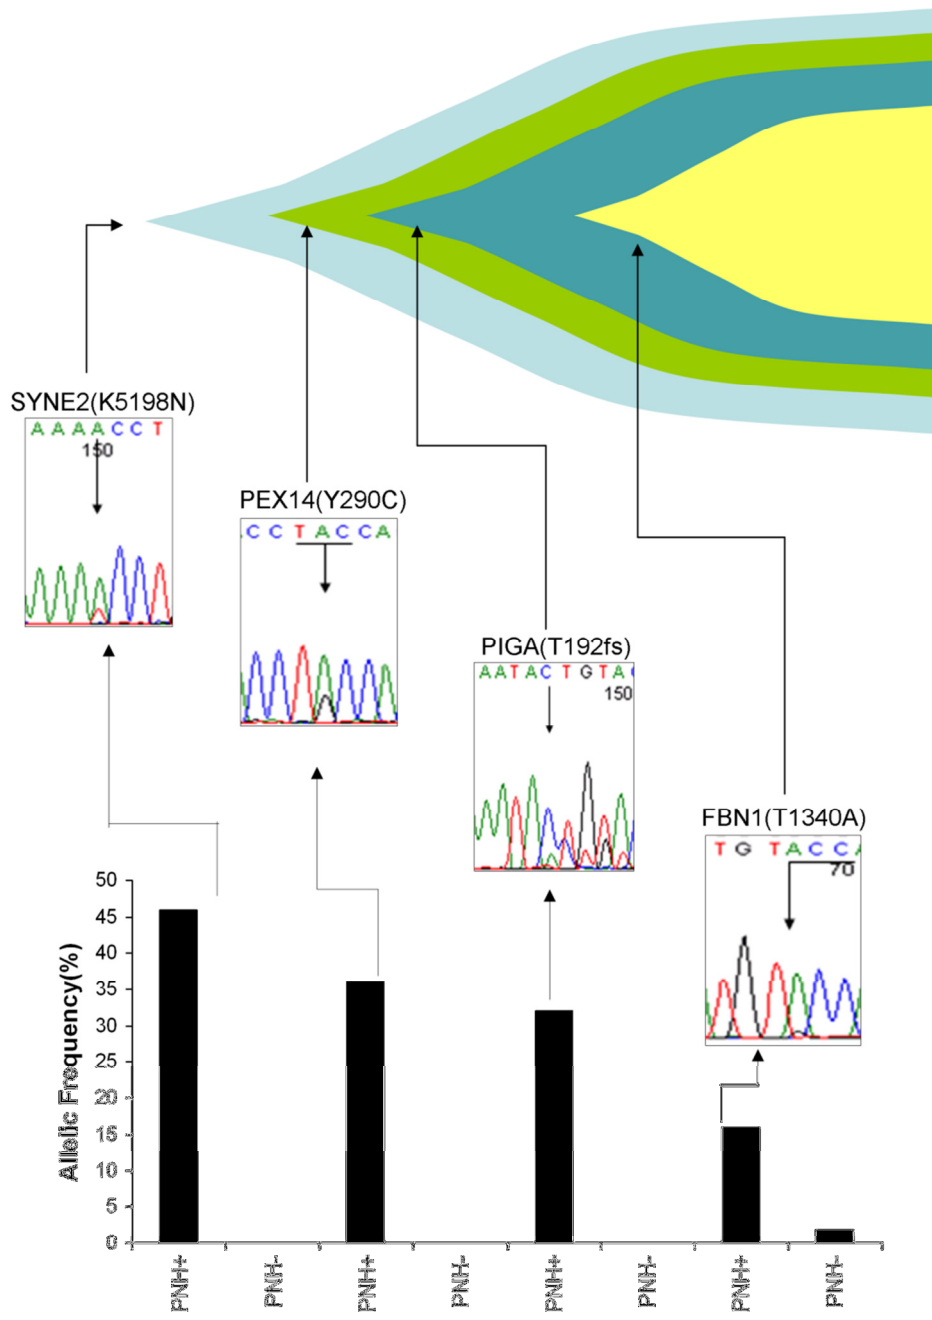

**Supplemental Figure 2: PNH10 mutational profile A)** Variant allelic frequencies reveal somatic SYNE2 and PEX14 gene mutations were the initial events, followed by a PIGA frameshift mutation and an additional FBN1 mutation.

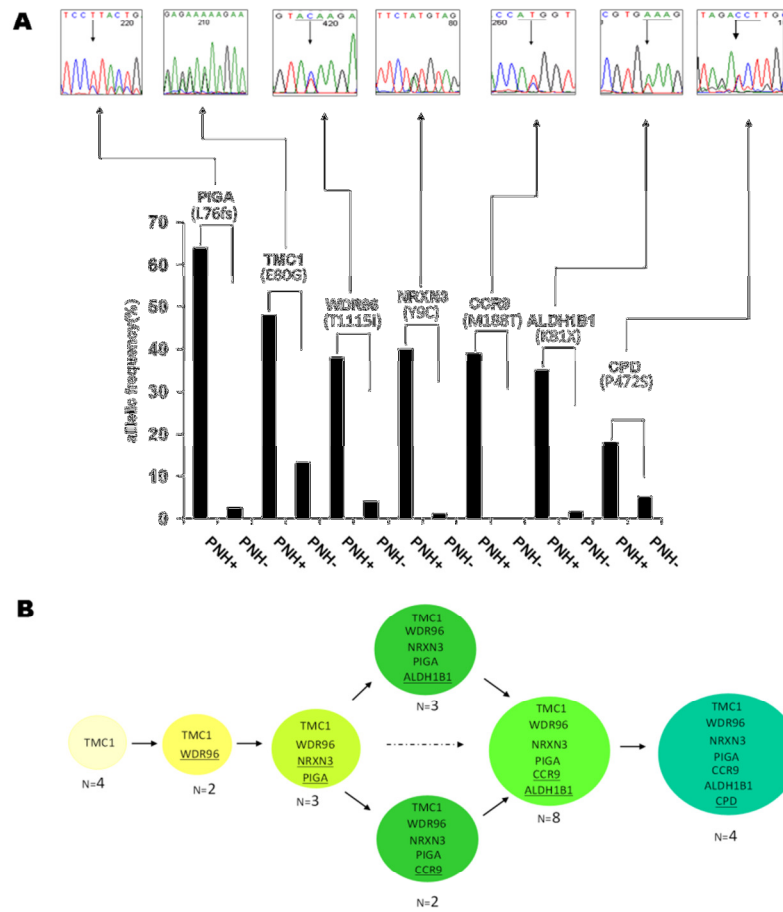

**Supplemental Figure 3: PNH3 mutational profile** **A)** Variant allelic frequencies reveal a complex set of mutations, some of which were present in the PNH- population as well as the PNH+ fraction. **B)** Single colony sequencing assays indicate that both the TMC1 and WDR96 mutations preceded the acquisition of a PIGA mutation.

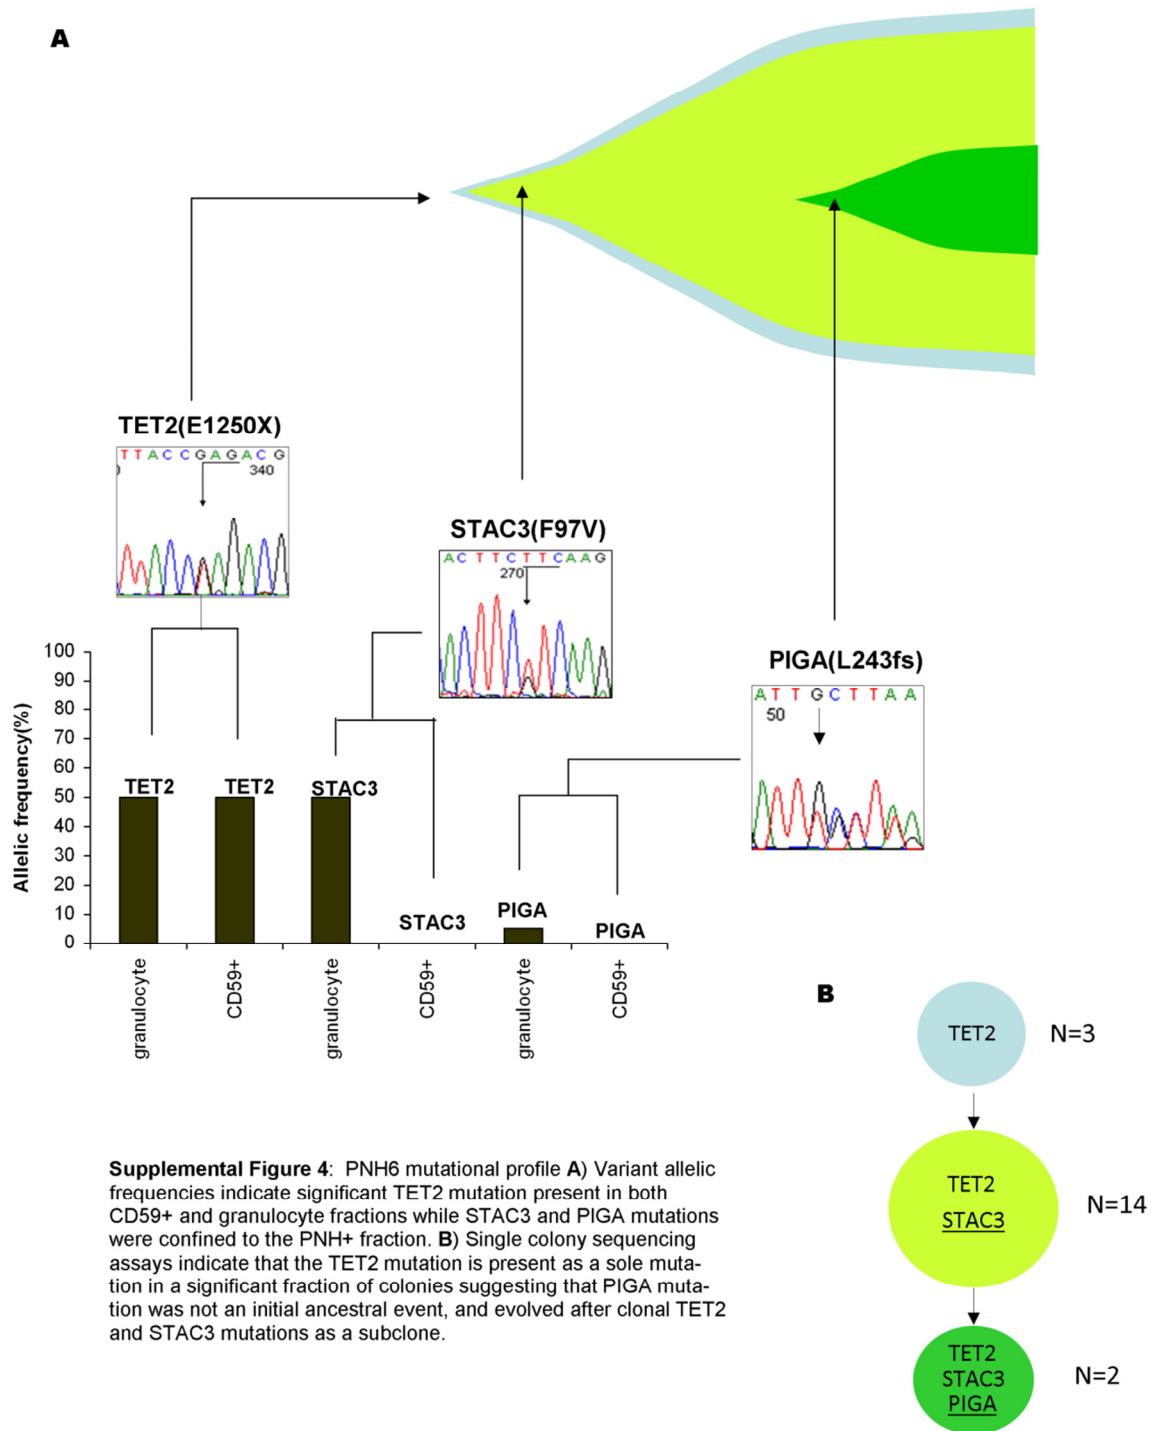

Supplement: JCI74747sd.pdf [file JCI74747sd.pdf]
